# Supplementary material
Source: Springer Nature journal article supplement (https://www.springermedizin.de/resource/supplementary/12885_2010_2678_MOESM1_ESM.pdf/9461782)

**a.**

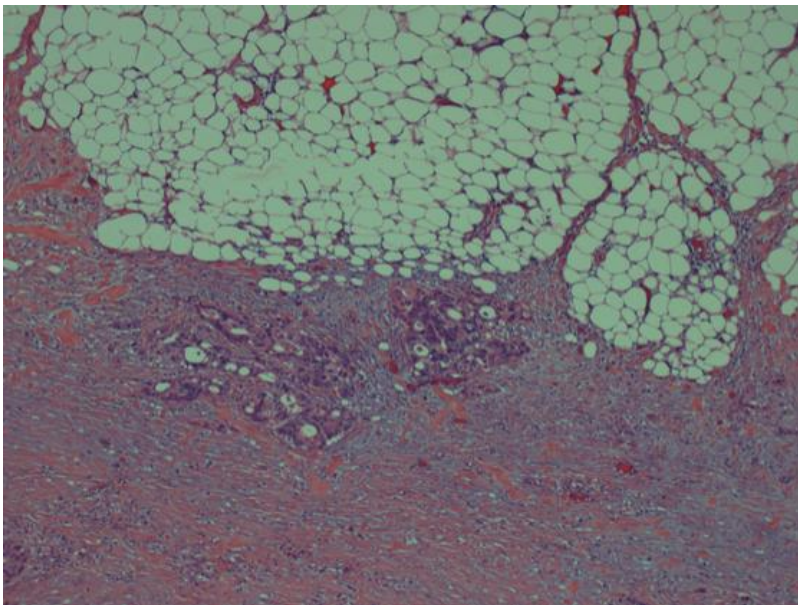

**b.**

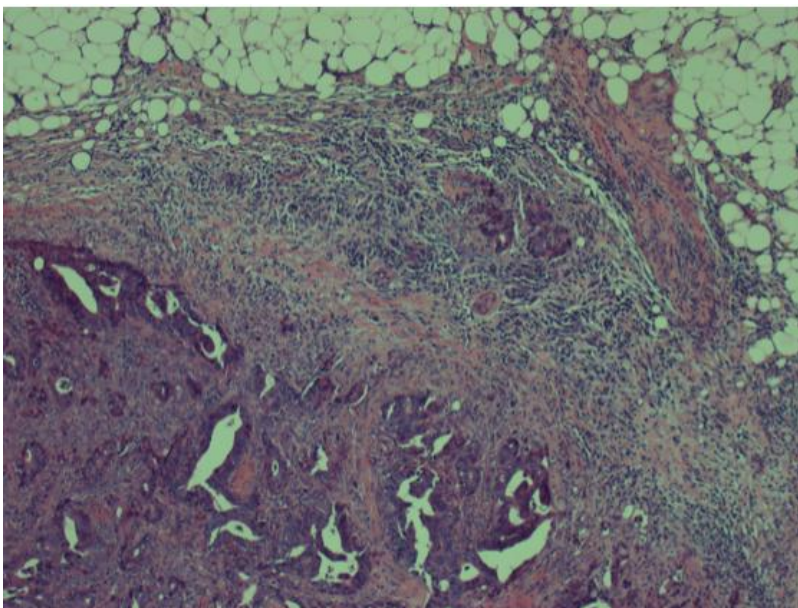

**c.**

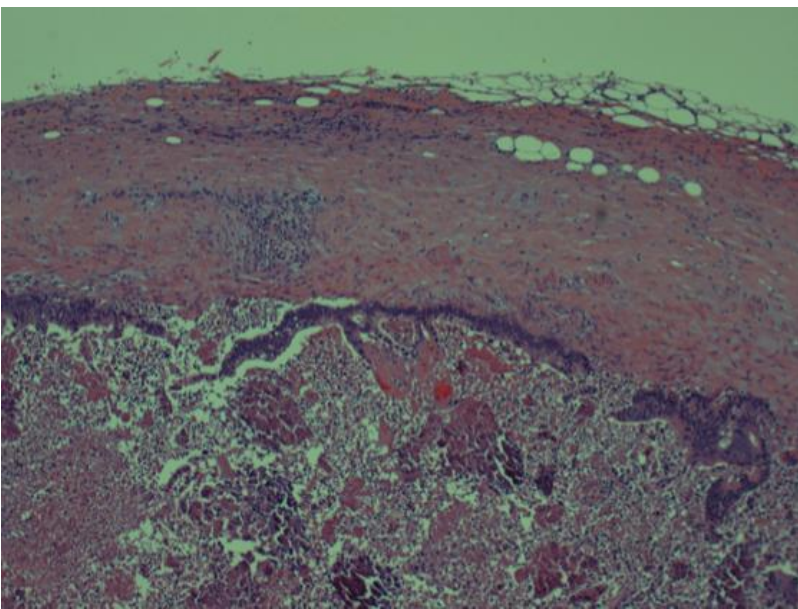

Supplement: MOESM1 [file 9461782]
